# Supplementary material for: Dynamic NMR investigations of fluxionality of 2-(dimethoxymethyl)pyridine and 2,6-bis(dimethoxymethyl)pyridine in rhenium(I) and platinum(IV) complexes †
Source: Royal Society of Chemistry journal article supplement (doi:10.1039/b005821l), 2000-01-01
Supplement: b005821l.doc [file b005821l.doc]

**ELECTRONIC SUPPLEMENTARY INFORMATION**

**Paper reference: B005821L**

**Table A** Synthetic, IR and analytical data for ReI and PtIV complexes of ligands L1 and L2.

| Complex | Colour | Reaction Time / hr | Yield / %*a* | M.p. / C | CO / cm-1 *b* | Analysis / % *c* C H N |
| --- | --- | --- | --- | --- | --- | --- |
| [ReBr(CO)3 L1] | dark red | 4 | 41 | 188 | 2032vs, 1925s, 1904s | 26.77 2.23 2.76  (26.25) (2.20) (2.78) |
| [ReCl(CO)3 L1] | dark red | 4 | 75 | 198-202 | 2030vs, 1926s, 1900s | 28.59 2.47 3.03  (28.79) (2.42) (3.05) |
| [PtBrMe3 L1] | bright yellow | 16 | 81 | 141 | - | 27.84 4.21 2.95  27.92) (4.26) (2.96) |
| [PtIMe3 L1] | bright yellow | 16 | 75 | 118 | - | 25.14 3.83 2.69  (25.39) (3.8 ) (2.69) |
| [ReBr(CO)3 L2] | dark red | 4 | 48 | 191*d* | 2032vs, 1925s, 1904s | 27.14 2.27 2.20  (27.62) (3.03) (2.48) |

*a* Yield quoted relative to metal–containing reactant .

*b* Recorded as solution in benzene; vs = very strong, s = strong.

*c* Calculated values in parentheses.

*d* Decomposition.

**ELECTRONIC SUPPLEMENTARY INFORMATION**

**Paper reference: B005821L**

**Table B.**  Mixing times and relative isomer populations used in the 2D-EXSY NMR experiments on *fac*-[ReBr(CO)3L2]

| Temperature / C | m / s | Rel. *trans*/*cis* populations |
| --- | --- | --- |
| -20 | 2.0 | 0.435/0.065 |
| -10 | 1.0 | 0.431/0.069 |
| 0 | 0.75 | 0.428/0.072 |
| 5 | 0.5 | 0.427/0.073 |
| 10 | 0.35 | 0.425/0.075 |
| 15 | 0.28 | 0.422/0.078 |
| 20 | 0.2 | 0.420/0.080 |
